# Supplementary material for: Characterizing the Potential of the Non-Conventional Yeast Saccharomycodes ludwigii UTAD17 in Winemaking
Source: MDPI journal article supplement (doi:10.3390/microorganisms7110478), 2019-10-23
Supplement: s1 [file s1]

Table S1: Comparative analysis of the predicted *S. ludwigii* UTAD17 ORFeome with the sets of proteins of *S. cerevisiae* S288c.

| <i>S. cerevisiae</i> gene | Protein Function                                               | <i>S. ludwigii</i> UTAD17 orthologous ORF name                                                        |
|---------------------------|----------------------------------------------------------------|-------------------------------------------------------------------------------------------------------|
| HXT1/HXT6                 | Hexose Transporter (low-affinity)                              | SCODWIG_02272/SCODWIG_01057/SCODWIG_03801/SCODWIG_03974/<br>SCODWIG_03563/SCODWIG_04015               |
| HXT2                      | Hexose Transporter (high-affinity)                             | SCODWIG_02272/SCODWIG_01057/SCODWIG_03801/SCODWIG_03974/<br>SCODWIG_03563/SCODWIG_04015/SCODWIG_03454 |
| HXT3/HXT5                 | Hexose Transporter (low-affinity)                              | SCODWIG_01057/SCODWIG_02272/SCODWIG_03801/SCODWIG_03974/<br>SCODWIG_03563/SCODWIG_04015/SCODWIG_03454 |
| HXT4/HXT7                 | Hexose Transporter (high-affinity)                             | SCODWIG_01057/SCODWIG_02272/SCODWIG_03801/SCODWIG_03974/<br>SCODWIG_03563/SCODWIG_04015/SCODWIG_03454 |
| HXT8                      | Hexose Transporter (unknown function)                          | SCODWIG_02272/SCODWIG_01057/SCODWIG_03801/SCODWIG_03974/<br>SCODWIG_03563/SCODWIG_04015/SCODWIG_03454 |
| HXT9                      | Hexose Transporter (putative)                                  | SCODWIG_01057/SCODWIG_02272/SCODWIG_03801/SCODWIG_03974/<br>SCODWIG_03563/SCODWIG_04015/SCODWIG_03454 |
| HXT10                     | Hexose Transporter (putative)                                  | SCODWIG_02272/SCODWIG_01057/SCODWIG_03801/SCODWIG_03974/<br>SCODWIG_03563/SCODWIG_04015/SCODWIG_03454 |
| HXT11                     | Hexose Transporter                                             | SCODWIG_01057/SCODWIG_02272/SCODWIG_03801/SCODWIG_03974/<br>SCODWIG_03563/SCODWIG_04015               |
| HXT13/HXT17               | Hexose Transporter (putative transmembrane polyol transporter) | SCODWIG_02272/SCODWIG_01057/SCODWIG_03801/SCODWIG_03974/<br>SCODWIG_03563/SCODWIG_04015               |
| HXT14                     | Hexose Transporter                                             | SCODWIG_03563/SCODWIG_02272/SCODWIG_01057/SCODWIG_03801/<br>SCODWIG_03974/SCODWIG_04015               |
| HXT15                     | Hexose Transporter (putative transmembrane polyol transporter) | SCODWIG_02272/SCODWIG_01057/SCODWIG_03801/SCODWIG_03974/<br>SCODWIG_03563/SCODWIG_03454/SCODWIG_04015 |
| HXT16                     | Hexose Transporter (putative transmembrane polyol transporter) | SCODWIG_02272/SCODWIG_03801/SCODWIG_03974/SCODWIG_03563/<br>SCODWIG_03454/SCODWIG_04015               |
| GAL2                      | Galactose Permease                                             | SCODWIG_02272/SCODWIG_01057/SCODWIG_03801/SCODWIG_03974/<br>SCODWIG_03563/SCODWIG_04015/SCODWIG_03454 |
| HXK1/HXK2                 | Hexokinase isoenzyme                                           | SCODWIG_02966/SCODWIG_01735                                                                           |
| GLK1/EMI2                 | Glucokinase                                                    | SCODWIG_01735/SCODWIG_02966                                                                           |
| PGI1                      | Phosphoglucose isomerase                                       | SCODWIG_01883                                                                                         |
| PFK1                      | Phosphofructokinase (alpha subunit)                            | SCODWIG_02053                                                                                         |
| PFK2                      | Phosphofructokinase (beta subunit)                             | SCODWIG_01491                                                                                         |
| FBA1                      | Fructose 1,6-bisphosphate aldolase                             | SCODWIG_00116                                                                                         |
| TPI1                      | Triose-Phosphate Isomerase                                     | SCODWIG_00702                                                                                         |
| TDH1                      | Triose-Phosphate Dehydrogenase isoenzyme 1                     | SCODWIG_02663/SCODWIG_02233/SCODWIG_00205                                                             |

|             |                                                                               |                                                                              |
|-------------|-------------------------------------------------------------------------------|------------------------------------------------------------------------------|
| TDH2/TDH3   | Triose-Phosphate Dehydrogenase isoenzyme 2                                    | <b>SCODWIG_02233/SCODWIG_02663/SCODWIG_00205</b>                             |
| PGK1        | 3-PhosphoGlycerate Kinase                                                     | <b>SCODWIG_01455</b>                                                         |
| GPH1        | Glycogen Phosphorylase                                                        | <b>SCODWIG_02626</b>                                                         |
| ENO1/ENO2   | Phosphopyruvate hydratase                                                     | <b>SCODWIG_00273</b>                                                         |
| PYK12/CDC19 | Pyruvate kinase                                                               | <b>SCODWIG_03273</b>                                                         |
| PDC5        | Pyruvate decarboxylase (minor isoform)                                        | <b>SCODWIG_02550/SCODWIG_03821</b>                                           |
| PDC6        | Pyruvate decarboxylase (minor isoform)                                        | <b>SCODWIG_02550/SCODWIG_03821</b>                                           |
| PDC1        | Pyruvate decarboxylase (major isoform)                                        | <b>SCODWIG_02550/SCODWIG_03821</b>                                           |
| ADH5/ADH1   | Alcohol dehydrogenase                                                         | <b>SCODWIG_02765/SCODWIG_01877/SCODWIG_00922/SCODWIG_04004/SCODWIG_01402</b> |
| ADH4        | Alcohol dehydrogenase (zinc-dependent)                                        | -                                                                            |
| ADH3        | Alcohol dehydrogenase(mitochondrial)                                          | <b>SCODWIG_01877/SCODWIG_02765/SCODWIG_04004/SCODWIG_00922</b>               |
| ADH2        | Alcohol dehydrogenase (glucose-repressible)                                   | <b>SCODWIG_02765/SCODWIG_01877/SCODWIG_04004/SCODWIG_00922</b>               |
| ADH6        | Alcohol dehydrogenase (NADPH-dependent)                                       | SCODWIG_02296/SCODWIG_01877                                                  |
| ADH7        | Alcohol dehydrogenase (NADPH-dependent)                                       | SCODWIG_02296                                                                |
| THI13       | HMP-P precursor synthesis                                                     | -                                                                            |
| THI20       | HMP kinase and HMP-P kinase                                                   | SCODWIG_03914/SCODWIG_03996/SCODWIG_04014                                    |
| THI21       | HMP kinase and HMP-P kinase                                                   | SCODWIG_03914/SCODWIG_03996/SCODWIG_04014                                    |
| THI4        | Thiazole synthase                                                             | SCODWIG_02921                                                                |
| THI6        | Thiamine-phosphate diphosphorylase and hydroxyethylthiazole kinase            | <b>SCODWIG_02681</b>                                                         |
| THI80       | Thiamine pyrophosphokinase                                                    | SCODWIG_03709                                                                |
| THI10/THI17 | Thiamine transporter                                                          | <b>SCODWIG_03263/SCODWIG_02398/SCODWIG_03795/SCODWIG_00195/SCODWIG_03794</b> |
| ATF1        | Alcohol acetyltransferase                                                     | -                                                                            |
| ATF2        | Alcohol acetyltransferase                                                     | -                                                                            |
| AYT1        | Acetyltransferase                                                             | -                                                                            |
| EEB1/EHT1   | Acyl-coenzymeA:ethanol O-acyltransferase                                      | SCODWIG_03242/SCODWIG_00846                                                  |
| MGL2        | Monoacylglycerol and triacylglycerol lipase (minor Acyl-transferase activity) | SCODWIG_00846                                                                |
| IAH1        | Isoamyl acetate-hydrolyzing esterase                                          | SCODWIG_03553                                                                |

*S. ludwigii* UTAD17 proteins were considered similar to those present in *S. cerevisiae* S288c when the associated alignment had a respective e-value below  $e^{-20}$  and a minimum identity of 30%. ORF's with an e-value of 0.0 are marked in bold.
